# Supplementary material for: Validation of methodology for efficient genotyping of CYP2D6 and CYP2C19
Source: Research Square preprint supplement (doi:10.21203/rs.3.rs-123677/v1), 2021-08-17
Supplement: Supplementary file 2 [file 2136769fbc0bae7173c76efb.xlsx]

## Sheet: CYP2C19 Star Allele Translator 
*** Name	CYP2C19 Star Allele Translator
*** Version	v4
*** Creator	Vasyl Yavorskyy & Katherine Aitchison
*** Creation Date	2019-08-12
*** Last Modifier	Katherine Aitchison
*** Last Modified Date	2019-11-18
*** Description	Translator for 11 CYP2C19 SNPs
***Copyright	Copyright ©2019 by The Governors of the University of Alberta
####		g.19154G>A	g.17948G>A	g.1A>G	g.90033C>T	g.12748G>A	g.19294T>A	g.12711T>C	g.12784G>A	g.-806C>T	g.12460G>C	g.19153C>T
	CYP2C19	rs4244285	rs4986893	rs28399504	rs56337013	rs72552267	rs72558186	rs41291556	rs17884712	rs12248560	rs17878459	rs6413438
	*1	G	G	A	C	G	T	T	G	C	G	C
	*2	A	G	A	C	G	T	T	G	C	G	C
	*2.002	A	G	A	C	G	T	T	G	C	C	C
	*3	G	A	A	C	G	T	T	G	C	G	C
	*4	G	G	G	C	G	T	T	G	C	G	C
	*4.002	G	G	G	C	G	T	T	G	T	G	C
	*5	G	G	A	T	G	T	T	G	C	G	C
	*6	G	G	A	C	A	T	T	G	C	G	C
	*7	G	G	A	C	G	A	T	G	C	G	C
	*8	G	G	A	C	G	T	C	G	C	G	C
	*9	G	G	A	C	G	T	T	A	C	G	C
	*10	G	G	A	C	G	T	T	G	C	G	T
	*17	G	G	A	C	G	T	T	G	T	G	C
