# Supplementary material for: Validation of methodology for efficient genotyping of CYP2D6 and CYP2C19
Source: Research Square preprint supplement (doi:10.21203/rs.3.rs-123677/v1), 2021-08-17
Supplement: Supplementary file 4 [file 56b2802a4441ab779357e7d8.xlsx]

## Sheet: Sheet1
TaqMan CNV data			PScan CNV data			IonS5	IonS5	AmpliChip	PScan	IonS5	Luminex (genomic) RUO	TaqMan *2 (genomic)	TaqMan *4 (genomic) rs3892097	TaqMan *4 (amplicon) rs3892097	TaqMan *3 (genomic)	TaqMan *6 (genomic)	Taqman *35 (genomic)	TaqMan *41 (genomic)	Consensus Genotype	Activity Score Consensus
												rs16947					rs769258	rs28371725
I2	I6	E9	5’	E9	3’	Gene	E9
3	3	3	3	3	3	3	3	*1xN/*4	(*1/*4)xN	*1/*4xN, *1.011/*4.002xN, *1xN/*4	(*1/*4); DUP	GG/G	CC/T	C	TT/T	NA	NA	CC/C	*1x2/*4	2
3	3	3	3	3	3	3	3	*1xN/*2	(*1/*2)xN	*1/*2.001xN, *1xN/*2.001	(*1/*2); DUP	GG/A	NA	C	TT/T	NA	CC/C	CC/C	*1x2/*2	3
3	3	3	3	3	3	3	3	*1/*2xN	(*1/*2)xN	*1/*2.001xN, *1xN/*2.001	(*1/*2); DUP	AA/G	CC/C	C	TT/T	NA	CC/C	CC/C	*2x2/*1	3
3	3	3	3	3	3	3	3	*1xN/*2	(*1/*2)xN	*1/*2.001xN, *1xN/*2.001	(*1/*2); DUP	GG/A	NA	C	TT/T	NA	CC/C	CC/C	*1x2/*2	3
3	3	3	3	3	3	3	3	*2xN/*4	(*2/*4)xN	*2.001/*4xN, *2.001xN/*4	(*2/*4); DUP	AA/G	NA	C	TT/T	NA	CC/C	CC/C	*2x2/*4	2
3	3	3	3	3	3	3	3	no data	(*2/*4)xN	*2.001/*4xN, *2.001xN/*4	(*2/*4); DUP	AA/G	CC/T	NA	NA	NA	NA	CC/C	*2x2/*4	2
3	3	3	2	3	3	3	3	*2/*2xN	*2/*2	*2.001/*2.001xN	(*2/*2); DUP	AA/A	CC/C	NA	NA	NA	NA	CC/C	*2x2/*2	3
3	3	3	2	3	3	3	3	*2/*2xN	*2/*2	*2.001/*2.001xN	(*2/*2); DUP	AA/A	CC/C	NA	NA	NA	NA	CC/C	*2x2/*2	3
3	3	3	3	3	3	3	3	*2xN/*41	*2/*2xN	*2/*2.001xN, *2.001/*2xN	(*2/*2); DUP	AA/A	NA	C	TT/T	NA	NA	CC/C	*2x2/*2	3
3	3	3	3	3	3	3	3	*1/*4xN	(*1/*4)xN	*1/*4xN, *1.011/*4.002xN, *1xN/*4	(*1/*4); DUP	GG/G	TT/C	T	TT/T	NA	NA	CC/C	*4x2/*1	1
3	3	3	3	3	3	UND	3	*1xN/*6	(*1/*6)xN	*1xN/*6	(*1/*6); DUP	GG/G	CC/C	NA	NA	AA/-	NA	CC/C	*1x2/*6	2
3	3	3	3	3	3	2	3	*1/*1xN	*1/*1xN	{*1/*1, *1/*61, *1xN/*5,...}	(*1/*1); DUP	GG/G	NA	NA	TT/T	NA	CC/C	CC/C	*1x2/*1	3
3	3	3	3	3	3	2	3	*1/*1xN	*1/*1xN	no translation available	(*1/*1); DUP	GG/G	NA	C	TT/T	NA	NA	CC/C	*1x2/*1	3
3	3	3	3	3	3	2	3	*1xN/*2	(*1/*2)xN	no translation available	(*1/*2); DUP	GG/A	NA	C	TT/T	NA	CC/C	CC/C	*1x2/*2	3
3	3	3	3	3	3	2	3	*2/*4xN	(*2/*4)xN	no translation available	(*2/*4); DUP	GG/A	TT/C	NA	NA	NA	NA	CC/C	*4x2/*2	1
3	3	3	3	3	3	2	3	*1xN/*4	(*1/*4)xN	no translation available	(*1/*4); DUP	GG/G	CC/T	C	TT/T	NA	NA	CC/C	*1x2/*4	2
3	3	2	3	3	3	3	3	*1xN/*2	(*1/*35)xN	*1/*35xN, *1xN/*35	(*1/*35); DUP	GG/A	NA	C	TT/T	NA	CC/T	CC/C	*1x2/*35	3
failed	3	3	3	3	3	2	3	*1/*1xN	*1/*1xN	no translation available	(*1/*1); DUP	GG/G	CC/C	C	TT/T	NA	CC/C	CC/C	*1x2/*1	3
4	4	4	3	3	3	3	3	*3/*41xN	(*1/*41)xN,(*3.001/*41)xN	no translation available	(*3/*41); DUP	AAA/G or AA/G	NA	C	TT/- or TTT/-	NA	NA	TTT/C or TT/C	*41x3/*3	1.5
3	3	3	3	3	3	2	3	no data	(*1/*4)xN	no translation available	(*1/*4); DUP	GG/G	TT/C	T	TT/T	NA	CC/C	CC/C	*4x2/*1	1
3	3	3	3	3	3	2	3	*2xN/*35	(*2/*35)xN	no translation available	(*2/*35); DUP	AA/A	CC/C	C	TT/T	NA	CC/T	CC/C	*2x2/*35	3
3	3	3	3	3	3	2	3	*1/*41xN	(*1/*2)xN	no translation available	(*1/*2); DUP	AA/G	CC/C	NA	NA	NA	CC/C	CC/C	*2x2/*1	3
Table S5.	Data for samples with at least one extra CYP2D6 gene (i.e., a duplication, or in the case of the sample of consensus genotype CYP2D6*41x3/*3, a multiplication, specifically, a triplication). Haplotype phasing was achieved by TaqMan genotyping of genomic DNA and/or of an amplicon specific for duplicated CYP2D6 gene (using primers as described by Gaedigk et al., 2007 [1]).
NA = not assayed; UND = undetected; DUP = duplication detected.
1. Gaedigk A., et al. Clin Pharmacol Ther. 81: 242-51 (2007).
