# Supplementary material for: Validation of methodology for efficient genotyping of CYP2D6 and CYP2C19
Source: Research Square preprint supplement (doi:10.21203/rs.3.rs-123677/v1), 2021-08-17
Supplement: Supplementary file 6 [file b168d71ae5f1cea1077bdbdc.xlsx]

## Sheet: S1 Primers
Hybrid	Primer Name	Primer Sequence	Reference
2D7-2D6	5000F	GTCGTCCAAGGTTCAAATAGG	Gaedigk, personal communication
2D7-2D6	8192R	CCCTGCAAGACTCCACGG	Gaedigk, personal communication
2D7-2D6	E1F	CAGCTCCCTTTATAAGGGAAGGGT	Hosono et al., 2009
2D7-2D6	4728F	CGAAATCGAGGATGAAGG	Gaedigk, personal communication
2D7-2D6	Universal fragment A reverse primer	CGACTGAGCCCTGGGAGGTAGGTA	Gaedigk et al., 2015
2D7-2D6	5041R	TTGTCAAGCCAGGATCAC	Gaedigk, personal communication
2D7-2D6	5681F	GCCCTGTGACCAGCTGGACAGAGCC	Gaedigk, personal communication
2D7-2D6	8615R	GGCAAGGGTAACTGACATCTG	Gaedigk, personal communication
2D7-2D6	5986R	GCCTTCCCAGTTCCCGC	Gaedigk, personal communication
2D7-2D6	6383R	CACGACCATGTCTGAGATGTCC	Gaedigk, personal communication
2D7-2D6	6944R	CACCTGTCAGCCCAGATGC	Gaedigk, personal communication
2D7-2D6	7511R	CCCTGTACTTCGATGTCAC	Gaedigk, personal communication
2D7-2D6	FE2	GGCCCTGACCCTCCCTCTGC	Broly et al., 1995
2D7-2D6	FE3	TGCCCGTCCCACCCCC	Broly et al., 1995
2D7-2D6	FE4	CCCGCATCTCCCACCCCC	Broly et al., 1995
2D7-2D6	FE5	GACCCCGTTCTGTCTGGTGT	Broly et al., 1995
2D7-2D6	FE6	GTATGCTCTCGGCCCTGCTC	Broly et al., 1995
2D7-2D6	FE7	GTGGGGACGCATGTCTGTCC	Broly et al., 1995
2D7-2D6	FE8	TCACCCTGCATCTCCTGCCC	Broly et al., 1995
2D7-2D6	RE3	GCCCTTCTGCCCATCACCC	Broly et al., 1995
Supplementary Table 1. Sequencing primers for the CYP2D7-2D6 and CYP2D6-2D7 hybrid haplotypes (sheet 1: CYP2D6*13; sheet 2: CYP2D6*4.013; sheet 3: CYP2D6*68). An asterisk denotes a novel (unpublished) primer, with the numbering being according to the ATG start on NG_008376.4 (LRG_303).

## Sheet: Sheet2
Hybrid	Primer Name	Primer Sequence	Reference
2D6-2D7 (*68)	2D6-Universal-D-F	CCAGAAGGCTTTGCAGGCTTCAG	Gaedigk et al., 2015
2D6-2D7 (*68)	-1108R	GACCACTCCTGTCCAGAGG	*
2D6-2D7 (*68)	Prealpha F	TCACCCCCAGCGGACTTATCA	Kramer et al., 2009
2D6-2D7 (*68)	1163F	CTCATGCCTATAATCCCAGC	Gaedigk, personal communication
2D6-2D7 (*68)	2908R	TGGCTCCCCTCCATTGTGC	Gaedigk, personal communication
2D6-2D7 (*68)	3131F	GGATCCTCCATAACGTTCCCACC	Gaedigk, personal communication
2D6-2D7 (*68)	3526F	TGTAATCGTGTCCCTGCAAG	Gaedigk, personal communication
2D6-2D7 (*68)	3922R	CCTGGTCGGAGAAGTCACC	Gaedigk, personal communication
2D6-2D7 (*68)	4628R	CAATGGGCTTGAATTCCCACTGCCAAG	Gaedigk, personal communication
2D6-2D7 (*68)	4728F	CGAAATCGAGGATGAAGG	Gaedigk, personal communication
2D6-2D7 (*68)	5041R	TTGTCAAGCCAGGATCAC	Gaedigk, personal communication
2D6-2D7 (*68)	-342F	TATGAGCCTAGCTGGGAGGT	*
2D6-2D7 (*68)	FE2	GGCCCTGACCCTCCCTCTGC	Broly et al., 1995
2D6-2D7 (*68)	FE4	CCCGCATCTCCCACCCCC	Broly et al., 1995
2D6-2D7 (*68)	FE5	GACCCCGTTCTGTCTGGTGT	Broly et al., 1995
2D6-2D7 (*68)	403F	CCAAAGGCCAAGGAAGAGTA	*
2D6-2D7 (*68)	1939F	AACGGTCTCTTGGACAAAGC	*
2D6-2D7 (*68)	P1	TCCCCCACTGACCCAACTCT	Gaedigk, personal communication
2D6-2D7 (*68)	RE2	CTCTGTCCCCACCGCTGCTT	Broly et al., 1995
2D6-2D7 (*68)	RE3	GCCCTTCTGCCCATCACCC	Broly et al., 1995
2D6-2D7 (*68)	RE5	CCGTGGCAGCCACTCTC	Broly et al., 1995
2D6-2D7 (*68)	139R	GTTAGCATCCCATTCCCAGA	*
2D6-2D7 (*68)	1819R	AGAGTCCTTGGCCTCTCCTG	*

## Sheet: Sheet1
Hybrid	Primer Name	Primer Sequence	Reference
2D6-2D7 (*4.013)	1163F	CTCATGCCTATAATCCCAGC	Gaedigk, personal communication
2D6-2D7 (*4.013)	2908R	TGGCTCCCCTCCATTGTGC	Gaedigk, personal communication
2D6-2D7 (*4.013)	4628R	CAATGGGCTTGAATTCCCACTGCCAAG	Gaedigk, personal communication
2D6-2D7 (*4.013)	Universal fragment D forward primer	CCAGAAGGCTTTGCAGGCTTCAG	Gaedigk et al., 2015
2D6-2D7 (*4.013)	Prealpha F	TCACCCCCAGCGGACTTATCA	Kramer et al., 2009
2D6-2D7 (*4.013)	P1	TCCCCCACTGACCCAACTCT	Sachse et al., 1997
2D6-2D7 (*4.013)	3922R	CCTGGTCGGAGAAGTCACC	Gaedigk, personal communication
2D6-2D7 (*4.013)	3131F	GGATCCTCCATAACGTTCCCACC	Gaedigk, personal communication
2D6-2D7 (*4.013)	3526F	TGTAATCGTGTCCCTGCAAG	Gaedigk, personal communication
2D6-2D7 (*4.013)	4728F	CGAAATCGAGGATGAAGG	Gaedigk, personal communication
2D6-2D7 (*4.013)	FE6	GTATGCTCTCGGCCCTGCTC	Broly et al., 1995
2D6-2D7 (*4.013)	FE7	GTGGGGACGCATGTCTGTCC	Broly et al., 1995
2D6-2D7 (*4.013)	RE3	GCCCTTCTGCCCATCACCC	Broly et al., 1995
2D6-2D7 (*4.013)	RE4	CCTCGGTCTCTCGCTCCGC	Broly et al., 1995
2D6-2D7 (*4.013)	RE5	CCGTGGCAGCCACTCTC	Broly et al., 1995
2D6-2D7 (*4.013)	RE6	ACTGTTTCCCAGATGGGCTC	Broly et al., 1995
2D6-2D7 (*4.013)	FE2	GGCCCTGACCCTCCCTCTGC	Broly et al., 1995
2D6-2D7 (*4.013)	8615R	GGCAAGGGTAACTGACATCTG	Gaedigk, personal communication
2D6-2D7 (*4.013)	RE2	CTCTGTCCCCACCGCTGCTT	Broly et al., 1995
2D6-2D7 (*4.013)	FE8	TCACCCTGCATCTCCTGCCC	Broly et al., 1995
2D6-2D7 (*4.013)	FE3	TGCCCGTCCCACCCCC	Broly et al., 1995
2D6-2D7 (*4.013)	4369F	GTTGGGATCATCCTCCTCAG	*
2D6-2D7 (*4.013)	-1360F	AAAAGCTAGACGTGGTGGCA	*
2D6-2D7 (*4.013)	-1108R	GACCACTCCTGTCCAGAGG	*
2D6-2D7 (*4.013)	8004F	CGACACTCATCACCAACCTGT	Gaedigk, personal communication
2D6-2D7 (*4.013)	8192R	CCCTGCAAGACTCCACGG	Gaedigk, personal communication
2D6-2D7 (*4.013)	-342F	TATGAGCCTAGCTGGGAGGT	*
2D6-2D7 (*4.013)	403F	CCAAAGGCCAAGGAAGAGTA	*
2D6-2D7 (*4.013)	1939F	AACGGTCTCTTGGACAAAGC	*
2D6-2D7 (*4.013)	2979F	GCCTCCTGCTCATGATCCTA	*
2D6-2D7 (*4.013)	3502F	ACCTAGTCCTCAATGCCACC	*
2D6-2D7 (*4.013)	139R	GTTAGCATCCCATTCCCAGA	*
2D6-2D7 (*4.013)	1819R	AGAGTCCTTGGCCTCTCCTG	*
2D6-2D7 (*4.013)	2715R	GGGATGTCATATGGGTCACA	*
2D6-2D7 (*4.013)	3588R	ACGGAAGGGGACAGGGAG	*
