# Supplementary material for: Validation of methodology for efficient genotyping of CYP2D6 and CYP2C19
Source: Research Square preprint supplement (doi:10.21203/rs.3.rs-123677/v1), 2021-08-17
Supplement: Supplementary file 7 [file 1f57454eaf0357f407de6ebd.xlsx]

## Sheet: Sheet1
AmpliChip	PScan r8.2 (20200221 translator)	PScan 2D6 CNV data			TaqMan CNV			IonS5 Call		IonS5	XL-PCR amplicon
												Potential hybrid or hybrid tandem	TaqMan *2 genomic calls	TaqMan *4 genomic calls	TaqMan 100C>T genomic calls	TaqMan *35 genomic calls	Consensus Genotype	Activity Score Consensus
													rs16947	rs3892097	rs1065852 (found in *10, and most *4s)	rs769258
		5pFlank	exon9	3pFlank	I2	I6	E9	2D6 Probe	E9 Probe (automatic call in brackets)
*4/*4	no call	2	2	2	1	2	2	1	2	no call	H	CYP2D7-2D6	G/-	T/-	A/G	C/-	*13+*4/*5	0
*4/*4	*4/*4	2	2	2	1	1	2	1	2	no call	G	CYP2D7-2D6	G/G	N/A	N/A	C/-	*13/*4.013	0
*1/*1	no call	1	2	2	1	1	2	1	2	no call	G	CYP2D7-2D6	G/G	C/C	G/G	C/-	*13/*1	1
*1/*1	no call	1	2	2	1	1	2	1	2	no call	G	CYP2D7-2D6	G/G	C/C	G/G	C/-	*13/*1	1
*1/*2xN	*1/*2	2	3	3	3*	3	3	2	3	no call	G	CYP2D7-2D6 +2D6	AA/G	CC/C	GG/G	C-/C	*13+*2/*1	2
no call	*1/*2	2	3	3	3*	3	3	2	3	no call	G	CYP2D7-2D6 +2D6	AA/G	CC/C	GG/G	C-/C	*13+*2/*1	2
no call	*1/*2	2	3	3	3*	3	3	2	3	no call	G	CYP2D7-2D6 +2D6	AA/G	CC/C	GG/G	C-/C	*13+*2/*1	2
*2/*41xN	*2/*41	2	3	3	3	3	3	2	UND	*2.001, *2.005, *2.012, *2.013, *2.018, *2.020 ,*2.021/*41	G	CYP2D7-2D6 +2D6	AA/A	CC/C	N/A	C-/C	*13+*2/*41	1.5
*4/*4	*4/*4	3	2	2	3	3	2	3	2	*4.002/*4.013+*4, *4.013/*4.002xN	E	CYP2D6-2D7 +2D6	GG/G	TT/T	AA/A	CC/C	*4.013+*4/4.002	0
*4/*35	*4/*35	3	2	2	3	3	2	2	2	*4/*35	E	CYP2D6-2D7 +2D6	GG/A	TT/C	AA/G	CC/T	*4.013+*4/*35	1	*4.013+*4/*35 is an option for Ion S5 when gene level call manually adjusted to 3
*1/*4	*1/*4	3	2	2	3	3	2	2	2	*1/*4, *1.011/*4.002	E	CYP2D6-2D7 +2D6	GG/G	TT/C	AA/G	CC/C	*4.013+*4/*1	1	*4.013+*4/*1 by Ion S5 when gene level call manually adjusted to 3
*1/*4	*1/*4	3	2	2	3	3	2	2	2	*1/*4, *1.011/*4.002	E	CYP2D6-2D7 +2D6	GG/G	TT/C	AA/G	CC/C	*4.013+*4/*1	1	*4.013+*4/*1 by Ion S5 when gene level call manually adjusted to 3
*4/*4	*4/*4	3	2	2	3	3	2	3	2 (UND)	*4.002/*4.013+*4, *4.013/*4.002xN	E	CYP2D6-2D7 +2D6	GG/G	TT/T	AA/A	CC/C	*4.013+*4/*4	0
*4/*4	*4/*4	3	2	2	3	3	2	2	2 (UND)	*4/*4, *4xN/*5	E	CYP2D6-2D7 +2D6	GG/G	TT/T	AA/A	CC/C	*4.013+*4/*4	0	*4.013+*4/*4 by Ion S5 when gene level call manually adjusted to 3
*2/*4	*2/*4	3	2	2	3	3	2	N/A	N/A	insufficient SNP data	E	CYP2D6-2D7 +2D6	GG/A	TT/C	AA/G	CC/C	*4.013+*4/*2	1
no call	*10/*35	3	2	2	3	3	2	2	2	*10/*35	E	CYP2D6-2D7 +2D6	GG/A	CC/C	AA/G	CC/T	*36 +*10/*35	1.25	*35/*36+*10 by Ion S5 when gene level call manually adjusted to 3
*4/*10	*4/*10	3	2	2	2	2	2	2	(2)	*4/*10	E	CYP2D6-2D7 +2D6	G-/G	T-/C	AA/A	CC/C	*68 +*4/*10	0.25
no call	*2/*10	2	3	3	3	3	3	2	3 (UND)	*2.001/*10, *2.001/*36	E and G	CYP2D7-2D6 +2D6/ CYP2D6-2D7	AA/G	CC/C	A/G	CC/C	*13+*10/*36	0.25
no call	*1/*4	3	2	2	3	2	2	3	2 (UND)	*1/*4.013+*4, *1x2/*4.013, *4x2/*61	E	CYP2D6-2D7 +2D6	GG/G	TT/C	AA/G	CC/C	*4.013+*4/*1	1
*2/*41xN	*2/*41	2	3	3	3	3	3	2	UND	*2.001, *2.005, *2.012, *2.013, *2.018, *2.020 ,*2.021/*41	G	CYP2D7-2D6 +2D6	AA/A	CC/C	N/A	CC/C	*13+*2/*41	1.5
					*The particular *13 sequence (GQ162807) to which these samples aligns has a switch region in intron 1.
Table S7.	Data including consensus genotypes for the samples with CYP2D7-2D6 or CYP2D6-2D7 hybrid genes or hybrid tandems.
N/A = not available; UND = undetected;
