# Supplementary material for: Validation of methodology for efficient genotyping of CYP2D6 and CYP2C19
Source: Research Square preprint supplement (doi:10.21203/rs.3.rs-123677/v1), 2021-08-17
Supplement: Supplementary file 8 [file 2a12e73536c48c527db6fe29.xlsx]

## Sheet: CYP2D6 Star Allele Translator v
*** Name	CYP2D6 Star Allele Translator
*** Version	v12.3
*** Creator	Vasyl Yavorskyy & Katherine Aitchison
** *Creation Date	2019-08-07
*** Last Modifier	Amanda Buchner and Aitchison KJ
*** Last Modified Date	08/02/2021
*** Description	CYP2D6_Cn, CYP2D6 exon9 CN & 20 SNP Assays
***Copyright	Copyright ©2019 by The Governors of the University of Alberta
***FT	Run date
####				-1584C>G	100C>T	137_138insT	882G>C	1022C>T	1708delT	1759G>T	1759G>A	1847G>A	2550delA	2616delAAG	2936A>C	2989G>A	3184G>A	4181G>C	1977_1978insG	1662G>C	124G>A	31G>A	2851C>T
	CYP2D6	CYP2D6_Cn	CYP2D6_exon9_Cn	rs1080985	rs1065852	rs72549357	rs201377835	rs28371706	rs5030655	rs5030865T	rs5030865A	rs3892097	rs35742686	rs5030656	rs5030867	rs28371725	rs59421388	rs1135840	rs72549354	rs1058164	rs5030862	rs769258	rs16947
	*1	1	1	G	G	-	C	G	A	C	C	C	T	T	T	C	C	C	-	C	C	C	G
	*1.011	1	1	G	G	-	C	G	A	C	C	C	T	T	T	C	C	C	-	G	C	C	G
	*1x2	2	2	G	G	-	C	G	A	C	C	C	T	T	T	C	C	C	-	C	C	C	G
	*2	1	1	G	G	-	C	G	A	C	C	C	T	T	T	C	C	G	-	G	C	C	A
	*2.001, *2.005, *2.012, *2.013, *2.018, *2.020 ,*2.021	1	1	C	G	-	C	G	A	C	C	C	T	T	T	C	C	G	-	G	C	C	A
	*2.004	1	1	G	G	-	C	G	A	C	C	C	T	T	T	C	C	G	-	C	C	C	A
	*2x2	2	2	G	G	-	C	G	A	C	C	C	T	T	T	C	C	G	-	G	C	C	A
	*2.001x2	2	2	C	G	-	C	G	A	C	C	C	T	T	T	C	C	G	-	G	C	C	A
	*3	1	1	G	G	-	C	G	A	C	C	C	-	T	T	C	C	C	-	C	C	C	G
	*4	1	1	G	A	-	C	G	A	C	C	T	T	T	T	C	C	G	-	G	C	C	G
	*4.002	1	1	G	A	-	C	G	A	C	C	T	T	T	T	C	C	G	-	C	C	C	G
	*4.012	1	1	G	G	-	C	G	A	C	C	T	T	T	T	C	C	C	-	G	C	C	G
	*4.013	1	0	G	A	-	C	G	A	C	C	T	T	T	T	C	C	G	-	G	C	C	G
	*4.013_2	1	0	G	A	-	C	G	A	C	C	T	T	T	T	C	C	C	-	G	C	C	G
	*4x2	2	2	G	A	-	C	G	A	C	C	T	T	T	T	C	C	G	-	G	C	C	G
	*4.013+*4	2	1	G	A	-	C	G	A	C	C	T	T	T	T	C	C	G	-	G	C	C	G
	*4.013+*4x2	3	2	G	A	-	C	G	A	C	C	T	T	T	T	C	C	G	-	G	C	C	G
	*4.013x2+*4	3	1	G	A	-	C	G	A	C	C	T	T	T	T	C	C	G	-	G	C	C	G
	*4.002x2	2	2	G	A	-	C	G	A	C	C	T	T	T	T	C	C	G	-	C	C	C	G
	*4.012x2	2	2	G	G	-	C	G	A	C	C	T	T	T	T	C	C	C	-	G	C	C	G
	*4.013x2	2	0	G	A	-	C	G	A	C	C	T	T	T	T	C	C	G	-	G	C	C	G
	*4.013x2+*4x2	4	2	G	A	-	C	G	A	C	C	T	T	T	T	C	C	G	-	G	C	C	G
	*5	0	0	noamp	noamp	noamp	noamp	noamp	noamp	noamp	noamp	noamp	noamp	noamp	noamp	noamp	noamp	noamp	noamp	noamp	noamp	noamp	noamp
	*6	1	1	G	G	-	C	G	-	C	C	C	T	T	T	C	C	C	-	C	C	C	G
	*6x2	2	2	G	G	-	C	G	-	C	C	C	T	T	T	C	C	C	-	C	C	C	G
	*6.003	1	1	G	G	-	C	G	-	C	C	C	T	T	T	C	C	G	-	C	C	C	G
	*7	1	1	G	G	-	C	G	A	C	C	C	T	T	G	C	C	C	-	C	C	C	G
	*8	1	1	G	G	-	C	G	A	A	C	C	T	T	T	C	C	G	-	G	C	C	A
	*9	1	1	G	G	-	C	G	A	C	C	C	T	-	T	C	C	C	-	C	C	C	G
	*9x2	2	2	G	G	-	C	G	A	C	C	C	T	-	T	C	C	C	-	C	C	C	G
	*10	1	1	G	A	-	C	G	A	C	C	C	T	T	T	C	C	G	-	G	C	C	G
	*10x2	2	2	G	A	-	C	G	A	C	C	C	T	T	T	C	C	G	-	G	C	C	G
	*11	1	1	C	G	-	G	G	A	C	C	C	T	T	T	C	C	G	-	G	C	C	A
	*12.001	1	1	G	G	-	C	G	A	C	C	C	T	T	T	C	C	G	-	G	T	C	A
	*12.002	1	1	G	G	-	C	G	A	C	C	C	T	T	T	C	C	G	-	C	T	C	A
	*13 (EU093102, *66)	0	1	noamp	G	A	C	noamp	A	C	C	C	T	T	T	noamp	C	G	-	C	C	T	G
	*13 (GQ162807, *77)	1	1	noamp	G	A	C	G	A	C	C	C	T	T	T	C	C	G	-	G	C	T	A
	*14	1	1	C	G	-	C	G	A	C	T	C	T	T	T	C	C	G	-	G	C	C	A
	*15	1	1	G	G	A	C	G	A	C	C	C	T	T	T	C	C	C	-	C	C	C	G
	*17	1	1	G	G	-	C	A	A	C	C	C	T	T	T	C	C	G	-	G	C	C	A
	*17x2	2	2	G	G	-	C	A	A	C	C	C	T	T	T	C	C	G	-	G	C	C	A
	*20	1	1	G	G	-	C	G	A	C	C	C	T	T	T	C	C	G	C	G	C	C	A
	*29	1	1	G	G	-	C	G	A	C	C	C	T	T	T	C	T	G	-	G	C	C	A
	*29x2	2	2	G	G	-	C	G	A	C	C	C	T	T	T	C	T	G	-	G	C	C	A
	*35	1	1	C	G	-	C	G	A	C	C	C	T	T	T	C	C	G	-	G	C	T	A
	*35x2	2	2	C	G	-	C	G	A	C	C	C	T	T	T	C	C	G	-	G	C	T	A
	*41	1	1	G	G	-	C	G	A	C	C	C	T	T	T	T	C	G	-	G	C	C	A
	*41x2	2	2	G	G	-	C	G	A	C	C	C	T	T	T	T	C	G	-	C	C	C	A
	*36	1	0	G	A	-	C	G	A	C	C	C	T	T	T	C	C	G	-	G	C	C	G
	*36+*10	2	1	G	A	-	C	G	A	C	C	C	T	T	T	C	C	G	-	G	C	C	G
	*36+*10x2	3	2	G	A	-	C	G	A	C	C	C	T	T	T	C	C	G	-	G	C	C	G
	*36x2	2	0	G	A	-	C	G	A	C	C	C	T	T	T	C	C	G	-	G	C	C	G
	*36x2+*10	3	1	G	A	-	C	G	A	C	C	C	T	T	T	C	C	G	-	G	C	C	G
	*36x2+*10x2	4	2	G	A	-	C	G	A	C	C	C	T	T	T	C	C	G	-	G	C	C	G
	*57	1	0	G	A	-	C	G	A	C	C	C	T	T	T	C	C	G	-	G	C	C	G
	*61	1	0	G	G	-	C	G	A	C	C	C	T	T	T	C	C	C	-	C	C	C	G
	*63	1	0	C	G	-	C	G	A	C	C	C	T	T	T	C	C	G	-	C	C	C	A
	*68	1	0	G	A	-	C	G	A	C	C	C	T	T	T	C	C	C	-	C	C	C	G
	*69	1	1	G	A	-	C	G	A	C	C	C	T	T	T	T	C	G	-	G	C	C	A
	*70	1	1	G	G	-	C	G	A	C	C	C	T	T	T	C	T	G	-	G	C	C	G
	*83	1	0	G	G	-	C	G	A	C	C	C	T	T	T	C	C	G	-	C	C	C	G
	*114	1	1	G	A	-	C	G	A	C	T	C	T	T	T	C	C	G	-	C	C	C	A
